# Supplementary material for: Enhancer regions show high histone H3.3 turnover that changes during differentiation
Source: eLife journal article supplement (doi:10.7554/elife.15316), 2016-06-15
Supplement: supp [file elife-15316-supp-v1.zip]

Figure 5 – figure supplement 1

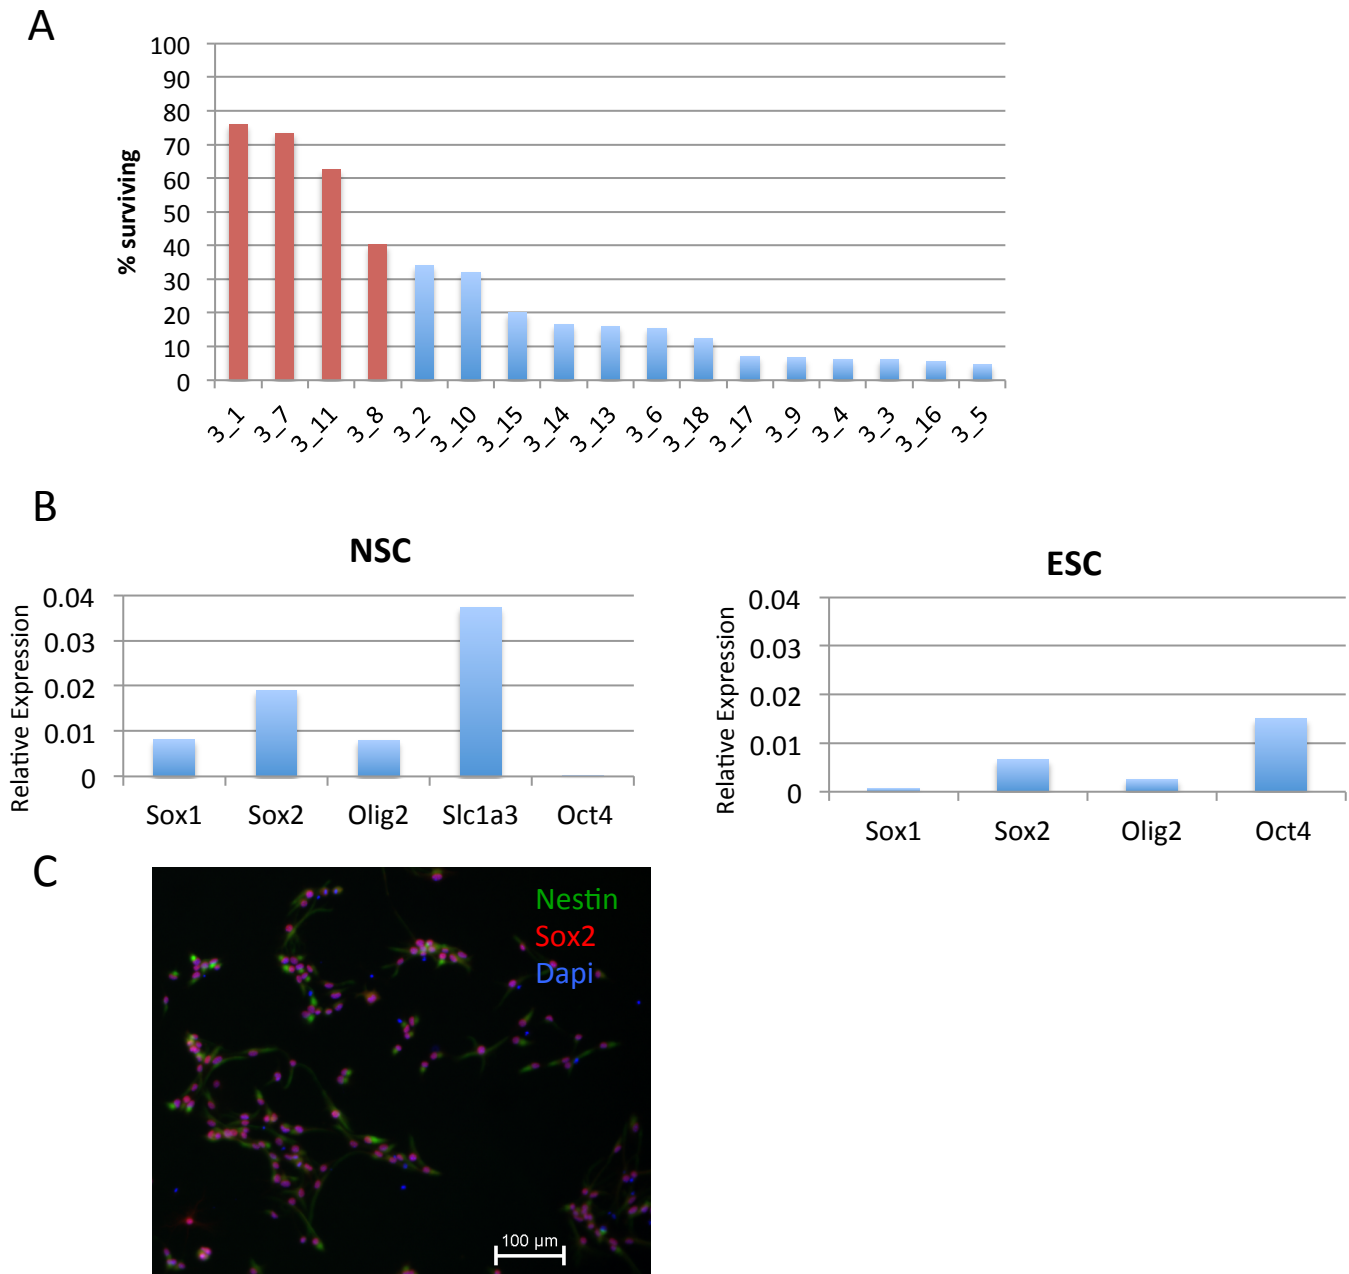

Figure 5 – figure supplement 1: Generation of H3.3\_SNAP NSCs.

- A) Screening for chimeric NSC lines expressing H3.3\_SNAP based on puromycin resistance. Red bars indicate cell lines that scored as highly chimeric. NSC line “3\_1” was used for time-ChIP studies.
- B) RT-qPCR showing expression of NSC markers (Sox1, Sox2, Olig2 and Slc1a3) but not the pluripotency marker Oct4 in H3.3\_SNAP NSCs. RT-qPCR in ESCs is shown for comparison. Expression is relative to the housekeeping gene *Eef1a1*.
- C) Immunofluorescence for NSC markers Sox2 (red) and Nestin (green) in H3.3\_SNAP NSCs.
