# Supplementary material for: Enhancer regions show high histone H3.3 turnover that changes during differentiation
Source: eLife journal article supplement (doi:10.7554/elife.15316), 2016-06-15
Supplement: supp [file elife-15316-supp-v1.zip]

## Figure 7 – figure supplement 1

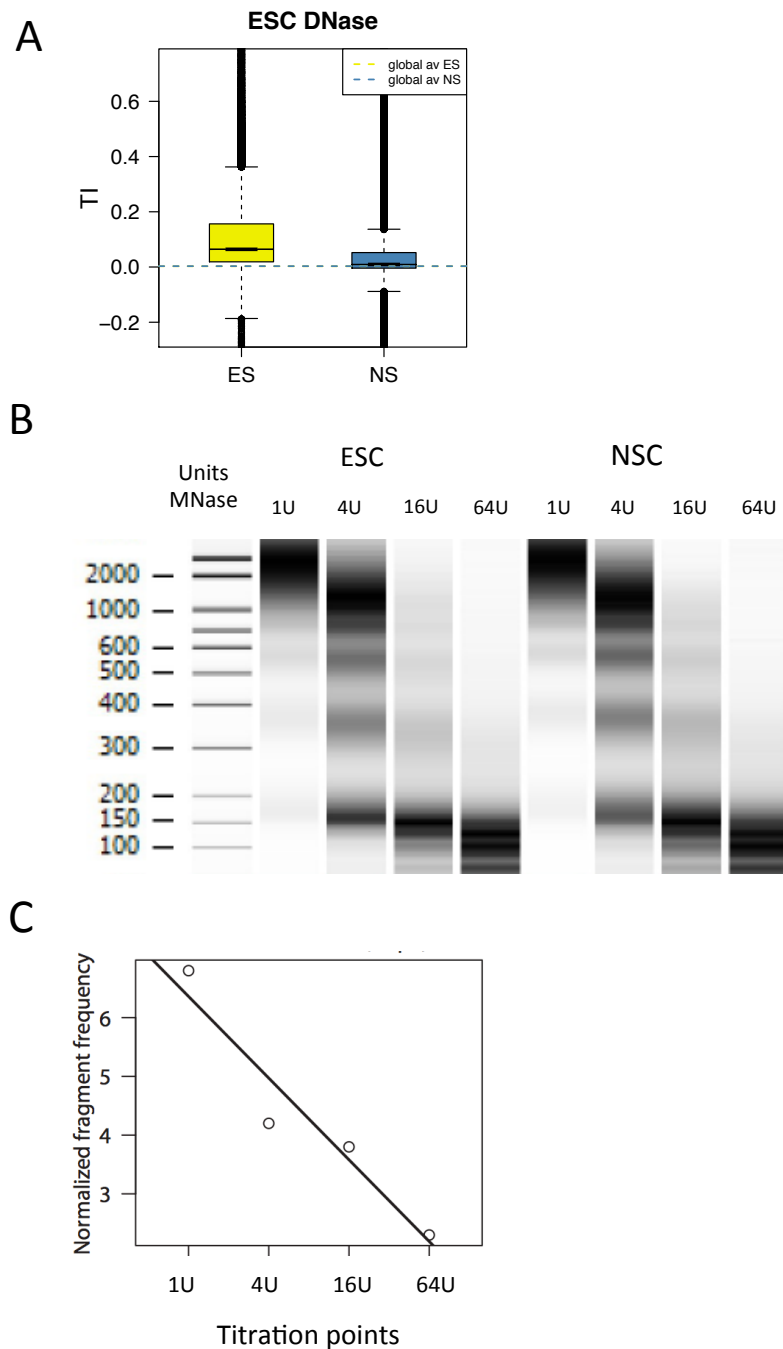

Figure 7 – figure supplement 1: Measuring DNA accessibility using MNase titration.

- A) Boxplot of average TI over DNase hypersensitive regions in E14 ESCs (Encode accession ENCSR000CMW). TI index was plotted over called DNase peaks (E14-DS18505.peaks.fdr0.01).
- B) MNase digestion patterns generated by digestion of ESC and NSC chromatin with varying concentrations of enzyme (1U, 4U, 16U, 64U).
- C) Sequencing data from each of the above titration points was used to generate an accessibility score (MACC) by fitting these to a linear model.
