# Supplementary material for: Enhancer regions show high histone H3.3 turnover that changes during differentiation
Source: eLife journal article supplement (doi:10.7554/elife.15316), 2016-06-15
Supplement: supp [file elife-15316-supp-v1.zip]

## Figure 4 – figure supplement 1

A

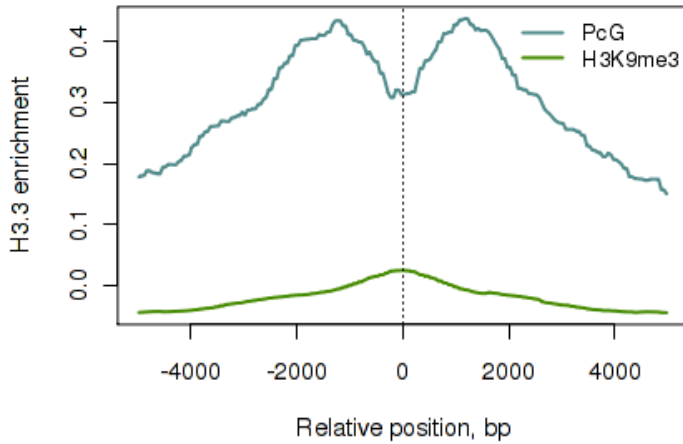

B

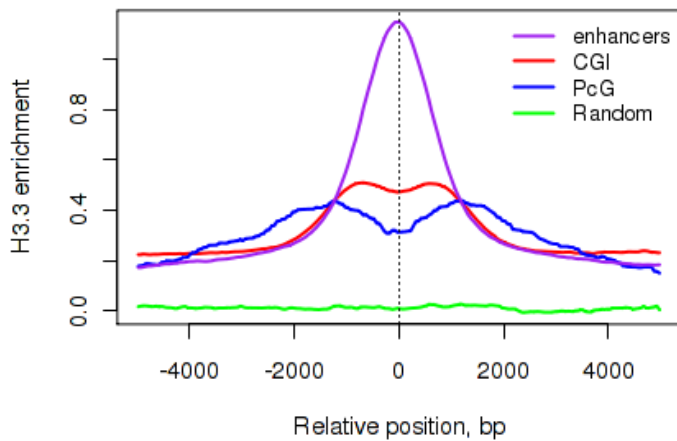

Figure 4 – figure supplement 1: H3.3 enrichment at PcG targets in ESCs.

- A) H3.3 enrichment in ESCs at PcG targets (grey) compared to H3K9me3 regions (green).
- B) H3.3 enrichment in ESCs at PcG targets (blue), CpG islands (CGI – red), enhancers (purple) and randomized PcG regions (green).
