# Supplementary material for: Enhancer regions show high histone H3.3 turnover that changes during differentiation
Source: eLife journal article supplement (doi:10.7554/elife.15316), 2016-06-15
Supplement: supp [file elife-15316-supp-v1.zip]

Figure 7 – figure supplement 2

A

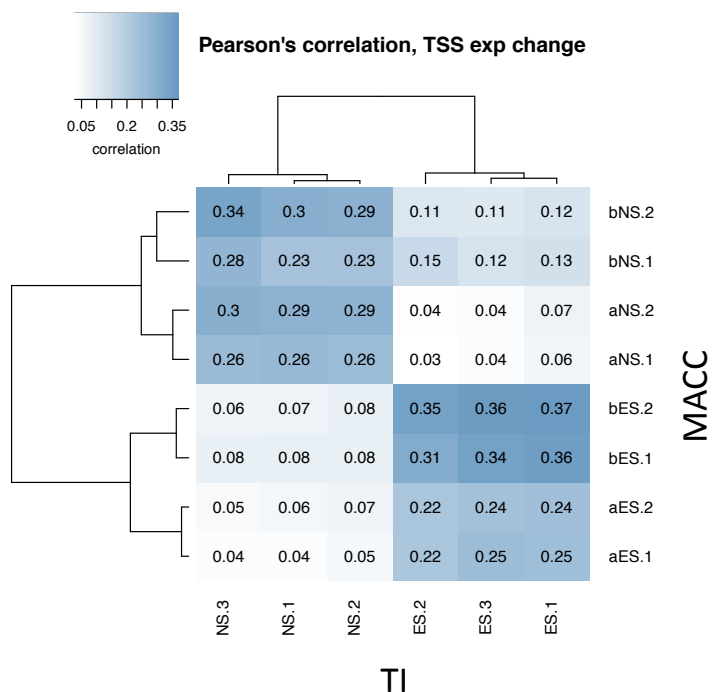

B

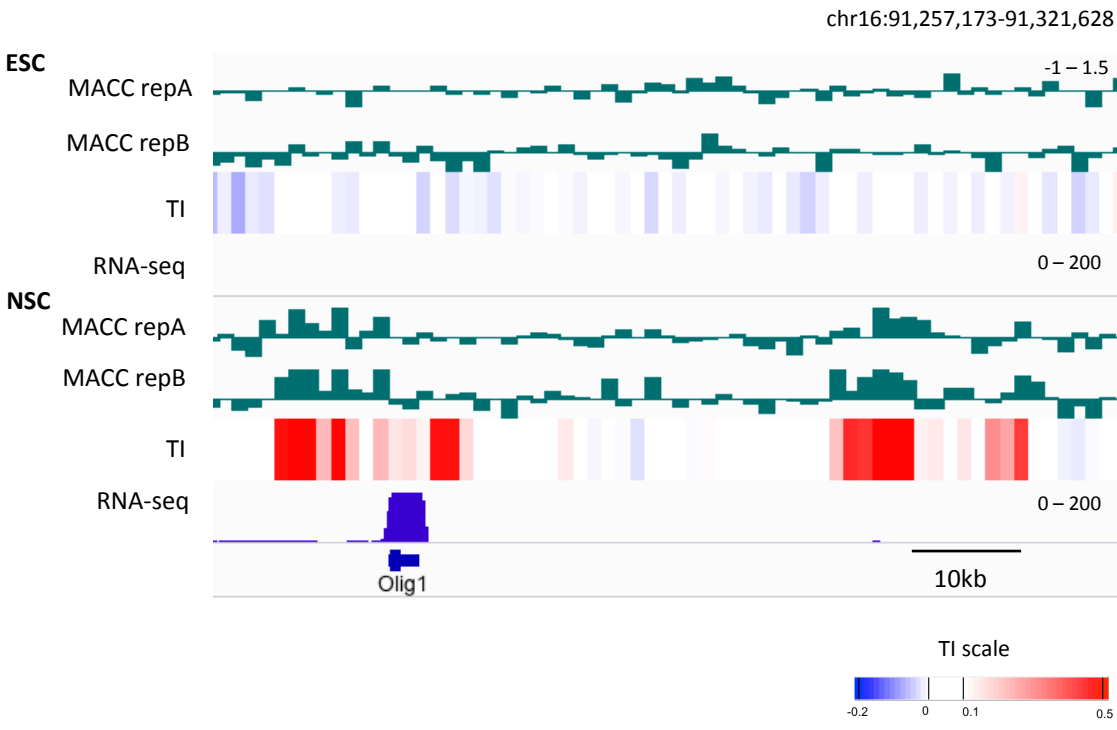

Figure 7 – figure supplement 2

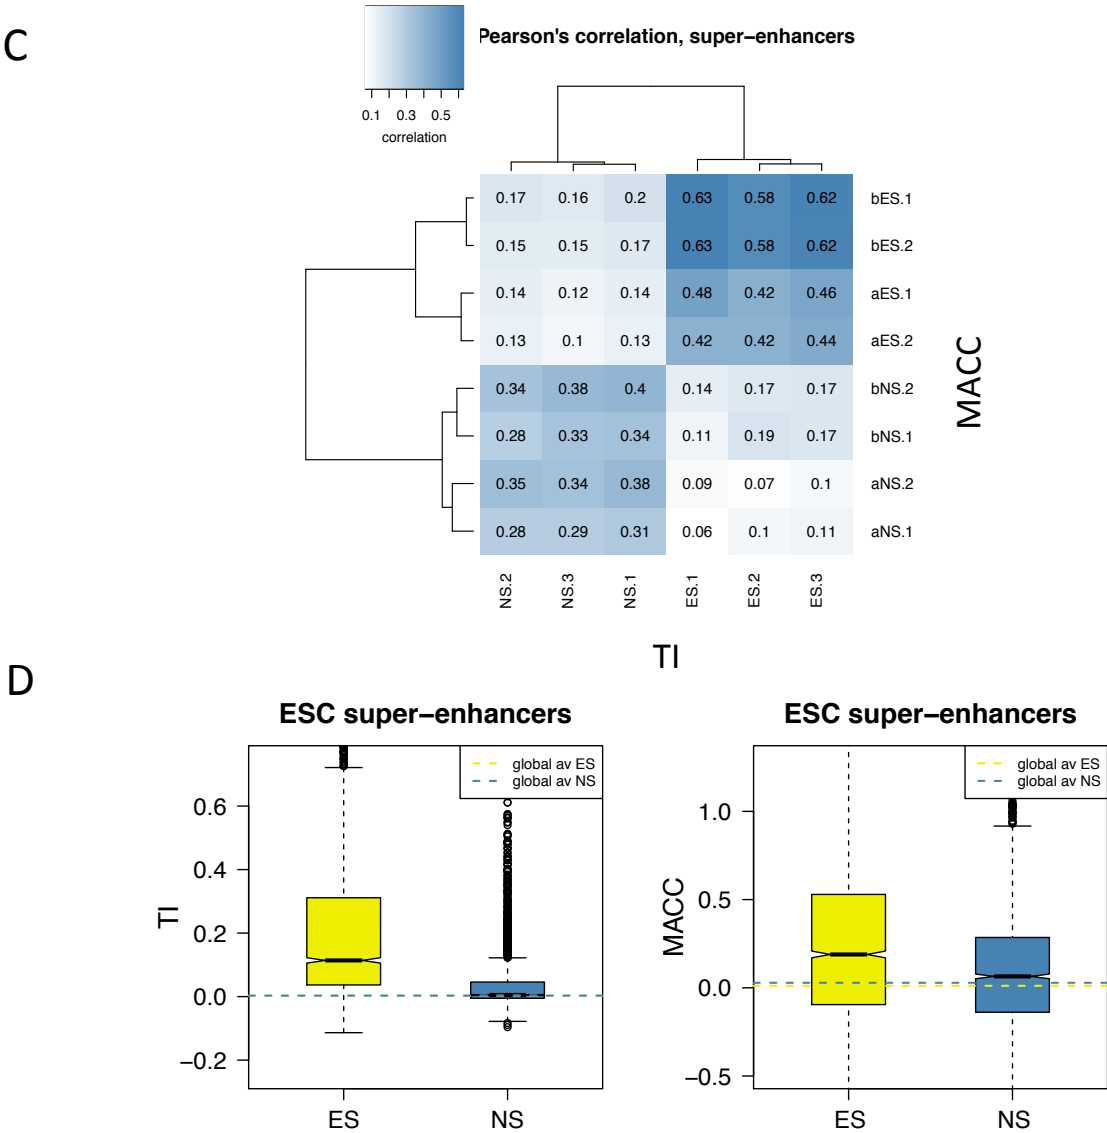

Figure 7 – figure supplement 2: Comparing turnover to DNA accessibility measured by MNase titration.

- A) Pearson's correlation between DNA accessibility as measured by MNase titration (MACC) and TI at the TSSs of genes differentially expressed in ESCs and NSCs. For MACC four replicates are shown for each cell type, two for ESC\_ and NSC\_H3.3\_SNAP lines ("a" replicates) and two for separate ESC and NSC lines ("b" replicates). Three biological replicates are shown for TI.
- B) *Olig1* is activated during neural differentiation and shows high MACC (green) and TI (heatmap) in NSCs but not ESCs. RNA-seq is shown in blue.
- C) Pearson's correlation between DNA accessibility as measured by MNase titration (MACC) and TI at ESC super-enhancers. Details as described in C.
- D) Boxplot of average TI and MACC values at ESC super-enhancers.
