# Supplementary material for: Enhancer regions show high histone H3.3 turnover that changes during differentiation
Source: eLife journal article supplement (doi:10.7554/elife.15316), 2016-06-15
Supplement: supp [file elife-15316-supp-v1.zip]

Figure 1 – figure supplement 3

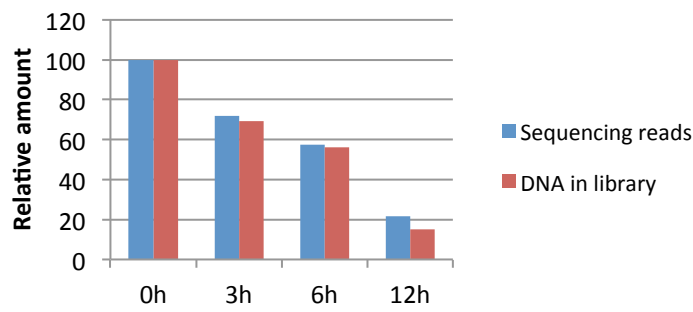

Figure 1 – figure supplement 3: Spike-in control  
Amount of DNA recovered relative to 0h time point (red bars) and proportion of sequencing reads mapping to the mouse genome relative to 0h time point based on the number of reads recovered from the spike-in control (blue bars). See “methods” for more details.
