# Supplementary material for: Enhancer regions show high histone H3.3 turnover that changes during differentiation
Source: eLife journal article supplement (doi:10.7554/elife.15316), 2016-06-15
Supplement: supp [file elife-15316-supp-v1.zip]

# Figure 1 – figure supplement 1

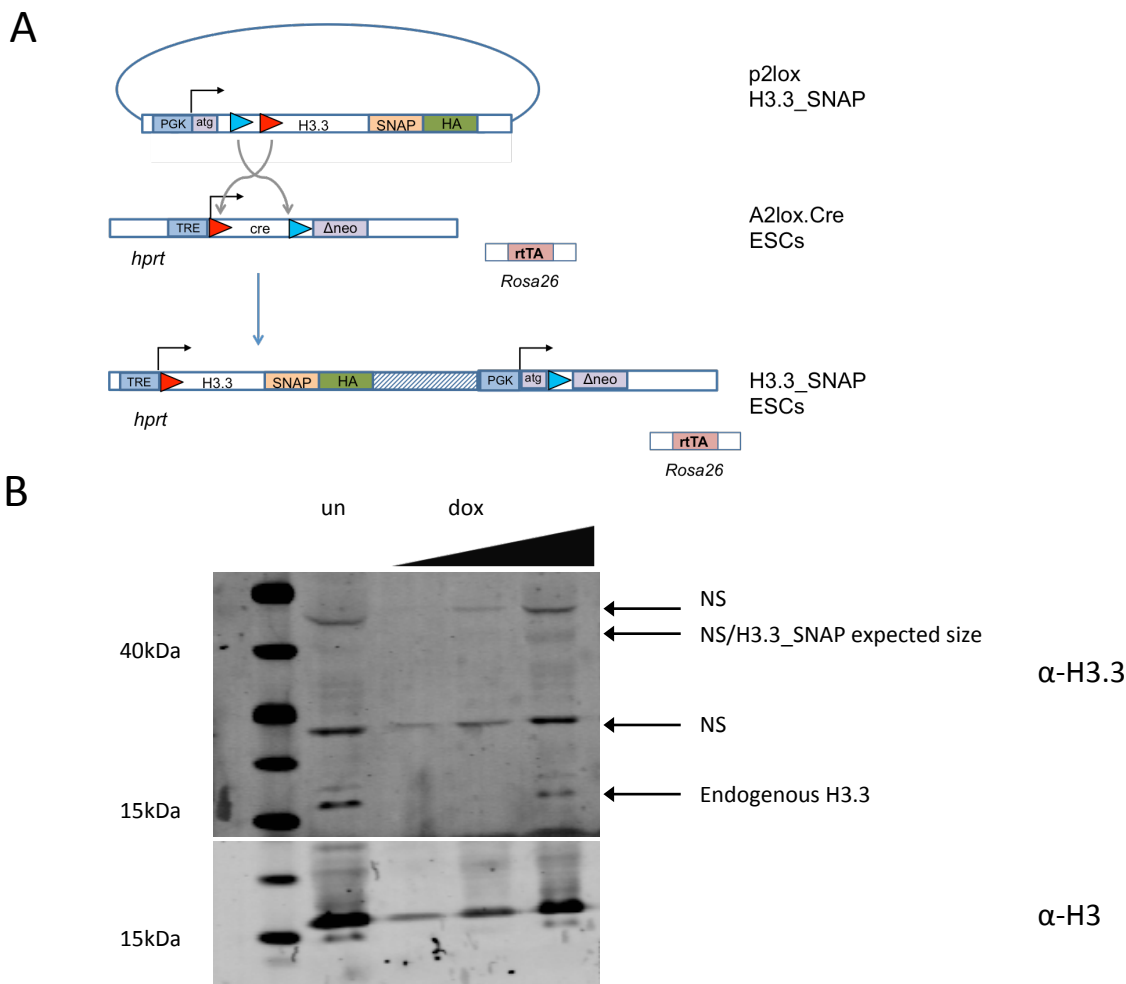

Figure 1 – figure supplement 1: Time-ChIP assay in H3.3\_SNAP ESCs.

- A) Generation of H3.3\_SNAP ESCs. The p2lox H3.3\_SNAP plasmid was introduced into A2lox.Cre ESCs resulting in H3.3\_SNAP ESCs expressing H3.3\_SNAP\_HA under dox inducible control from the *hpRT* locus along with a neomycin resistance gene. These cells contain rtTA expressed from the *Rosa26* locus to mediate dox inducible expression.
- B) Western blot for H3.3 in H3.3\_SNAP ESCs. For dox induced samples (“dox”), increasing amounts of protein were loaded, for the uninduced sample (“un”), only the highest protein concentration was loaded. Non-specific bands present in both the uninduced and dox induced samples are marked as “NS”. Endogenous H3 serves as a loading control.
