# Supplementary material for: Enhancer regions show high histone H3.3 turnover that changes during differentiation
Source: eLife journal article supplement (doi:10.7554/elife.15316), 2016-06-15
Supplement: supp [file elife-15316-supp-v1.zip]

## Figure 3 – figure supplement 2

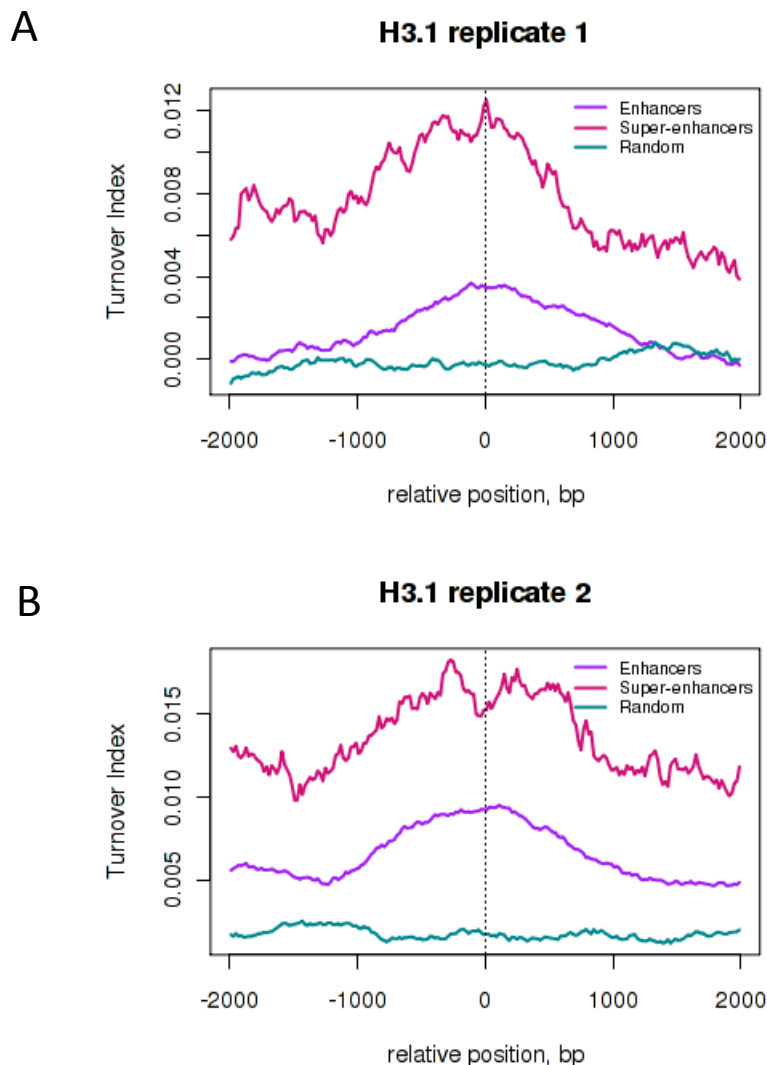

Figure 3 – figure supplement 2: H3.1 turnover at ESC enhancers and super-enhancers. Average H3.1 TI over conventional ESC enhancers (“Enhancers” – purple), super-enhancer constituent enhancers (“Super-enhancers” – pink) and random genomic regions with a similar size distribution to enhancers (“Random” – teal). Enhancers and super-enhancers are as described in Whyte et al., 2013.

- A) H3.1 biological replicate 1
- B) H3.1 biological replicate 2
