# Supplementary material for: Enhancer regions show high histone H3.3 turnover that changes during differentiation
Source: eLife journal article supplement (doi:10.7554/elife.15316), 2016-06-15
Supplement: supp [file elife-15316-supp-v1.zip]

## Figure 1 – figure supplement 2

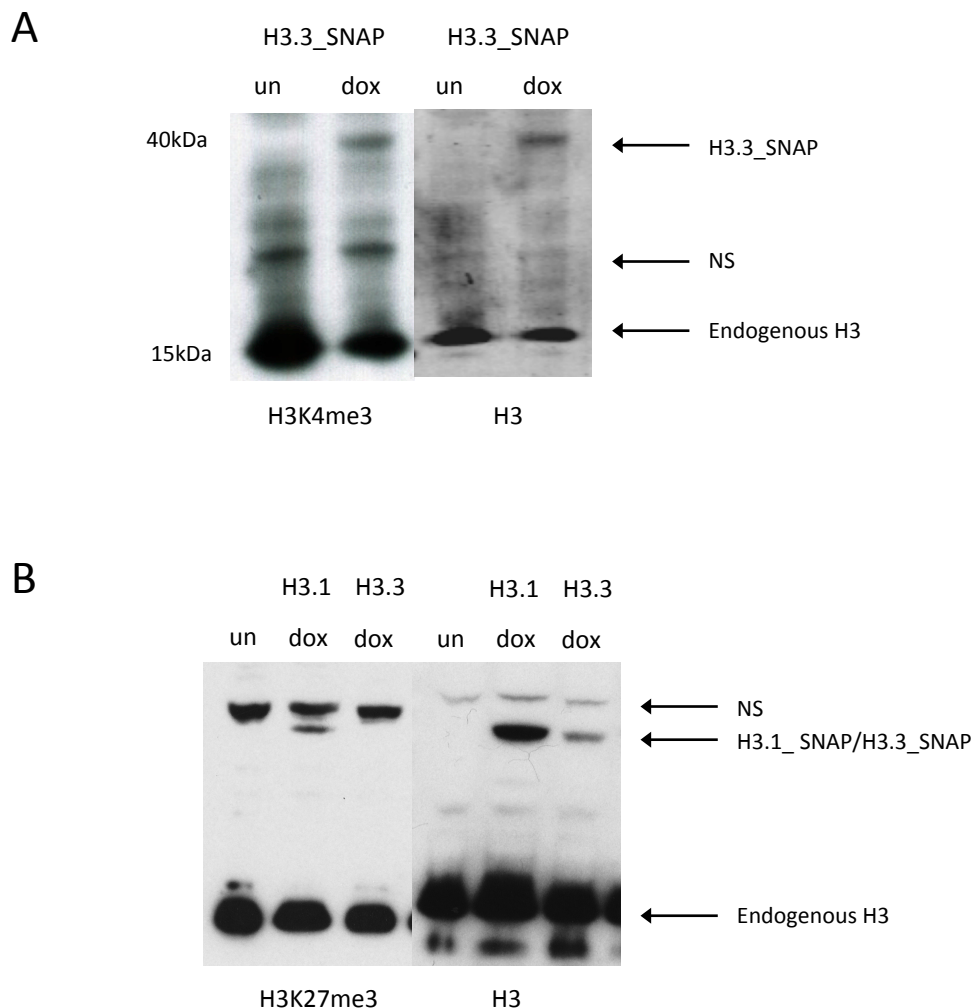

Figure 1 – figure supplement 2: Post-translational modification of SNAP-tagged histones.

- A) Western blot for H3K4me3 H3.3\_SNAP ESCs. Uninduced sample (“un”) does not have any H3.3\_SNAP, upon dox induction (“dox”) H3K4me3 modified H3.3\_SNAP is observed. Non-specific bands present in both the uninduced and dox induced samples are marked as “NS”. Histone H3 serves as a loading control.
- B) Western blot for H3K27me3 in H3.1\_SNAP and H3.3\_SNAP ESCs. Uninduced sample (“un”) does not have any H3.1\_SNAP or H3.3\_SNAP, upon dox induction (“dox”) H3K27me3 modified H3.1\_SNAP is observed. Non-specific bands present in both the uninduced and dox induced samples are marked as “NS”. Histone H3 serves as a loading control.
