# Supplementary material for: Enhancer regions show high histone H3.3 turnover that changes during differentiation
Source: eLife journal article supplement (doi:10.7554/elife.15316), 2016-06-15
Supplement: supp [file elife-15316-supp-v1.zip]

## Figure 2 – figure supplement 1

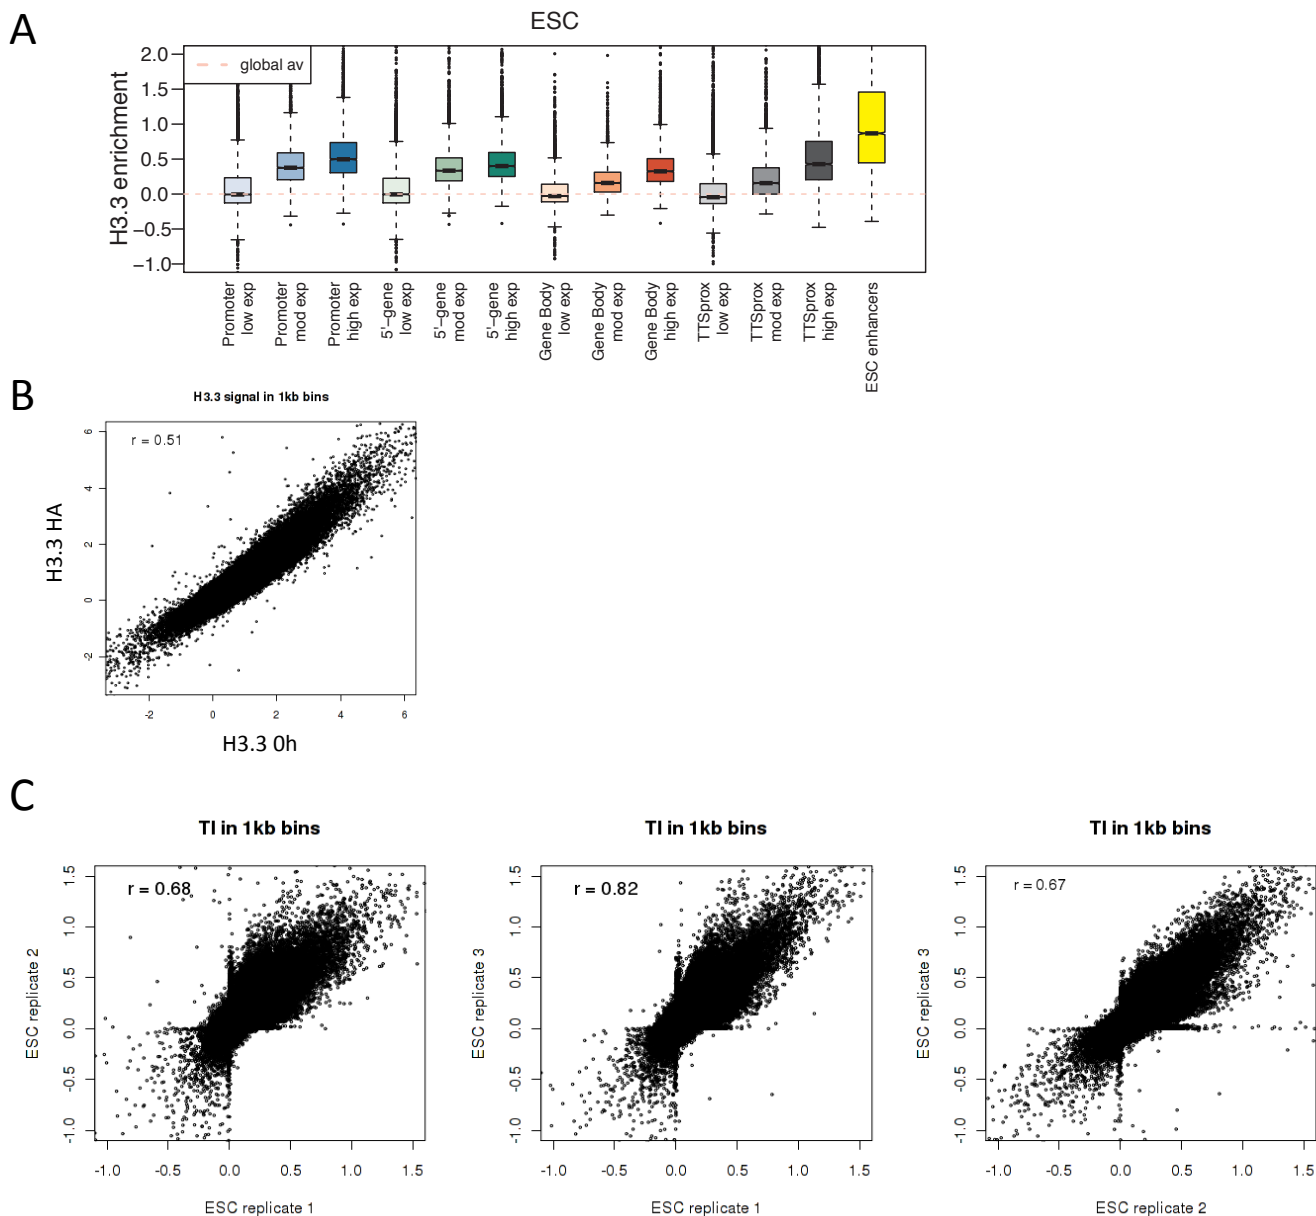

Figure 2 – figure supplement 1: H3.3 enrichment in ESCs and TI correlation between replicates.

- A) H3.3 enrichment in ESCs at annotated genomic elements – promoters, 5' end of genes, gene bodies, TTSs and enhancers. Genes are grouped by ESC expression level and ES enhancers are from Whyte et al., 2013.
- B) Scatter plot of H3.3 enrichment calculated in 1kb bins for ESC H3.3\_HA ChIP and H3.3 0h time-ChIP samples. R value is from Pearson's correlation.
- C) Scatter plots comparing TI calculated for the three ESC time-ChIP replicates. R value is from Pearson's correlation.
