# Supplementary material for: Enhancer regions show high histone H3.3 turnover that changes during differentiation
Source: eLife journal article supplement (doi:10.7554/elife.15316), 2016-06-15
Supplement: supp [file elife-15316-supp-v1.zip]

## Figure 3 – figure supplement 1

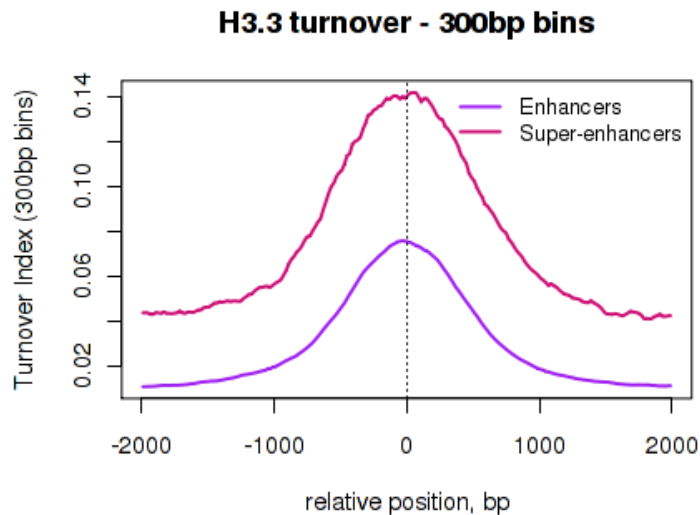

Figure 3 – figure supplement 1: H3.3 turnover at enhancers and super-enhancers calculated using a 300bp bin size.

Average H3.3 TI over conventional ESC enhancers (“Enhancers” – purple) and super-enhancer constituent enhancers (“Super-enhancers” – pink) where TI was calculated using a 300bp bin size. The mean TI for three biological replicates is shown. Enhancers and super-enhancers are as described in Whyte et al., 2013.
