# Supplementary material for: Enhancer regions show high histone H3.3 turnover that changes during differentiation
Source: eLife journal article supplement (doi:10.7554/elife.15316), 2016-06-15
Supplement: supp [file elife-15316-supp-v1.zip]

## Figure 5 – figure supplement 2

A

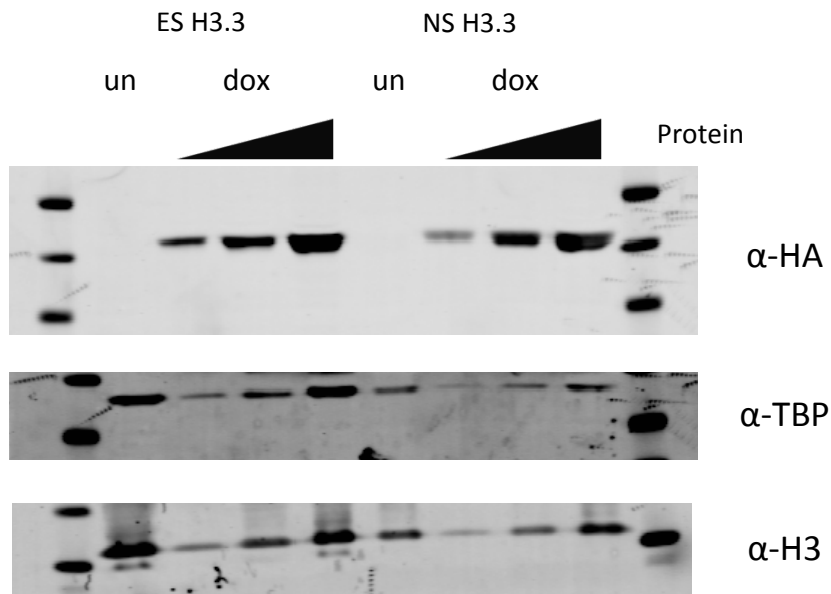

B

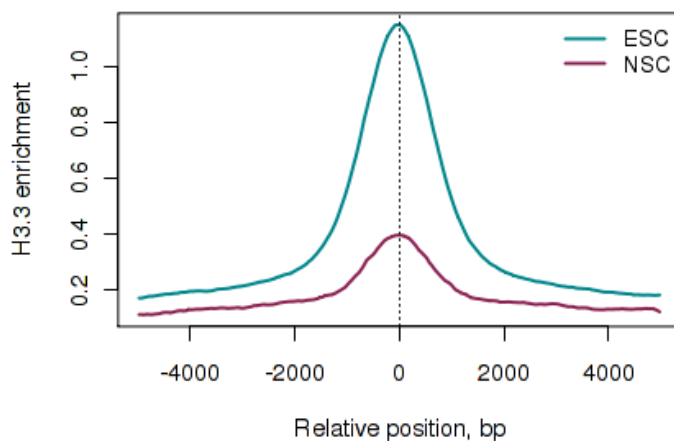

Figure 5 – figure supplement 2: Measuring turnover in H3.3\_SNAP NSCs.

- A) Western blot showing expression of H3.3\_SNAP upon dox induction in ESCs compared to NSCs. For dox induced samples (“dox”), increasing amounts of protein were loaded, for uninduced samples (“un”) only the highest protein concentration was loaded. H3.3\_SNAP is detected using an anti-HA antibody while endogenous H3 and TBP serve as loading controls.
- B) H3.3 enrichment at ESC enhancers is reduced in NSCs (purple) compared to ESCs (cyan).
